# Supplementary material for: HDAC1 Inactivation Induces Mitotic Defect and Caspase-Independent Autophagic Cell Death in Liver Cancer
Source: PLoS One. 2012 Apr 4;7(4):e34265. doi: 10.1371/journal.pone.0034265 (PMC3319574; doi:10.1371/journal.pone.0034265)
Supplement: Table S3 — Oligonucleotide sequences for shRNA plasmid construction. (XLS) [file pone.0034265.s003.xls]

## Sheet: Sheet1
Table S3. Oligonucleotide sequences for shRNA plasmid construction
Oligo		Sequence
HDAC1shRNA	top	GATCCGGCAAGTATTATGCTGTTATTCAAGAGATAACAGCATAATACTTGCCTTTTTTGGAAA
	bottom	AGCTTTTCCAAAAAAGGCAAGTATTATGCTGTTATCTCTTGAATAACAGCATAATACTTGCCG
HDAC1 scrambled shRNA	top	GATCCGTATGTTCCGGTAAGATATTTCAAGAGAATATCTTACCGGAACATACTTTTTTGGAAA
	bottom	AGCTTTTCCAAAAAAGTATGTTCCGGTAAGATATTCTCTTGAAATATCTTACCGGAACATACG
