# Supplementary material for: HDAC1 Inactivation Induces Mitotic Defect and Caspase-Independent Autophagic Cell Death in Liver Cancer
Source: PLoS One. 2012 Apr 4;7(4):e34265. doi: 10.1371/journal.pone.0034265 (PMC3319574; doi:10.1371/journal.pone.0034265)
Supplement: Table S5 — Antibodies used in the present study. (XLS) [file pone.0034265.s005.xls]

## Sheet: Sheet1
Table S5. Antibodies used in the present study
Name	*Species (clone No.)	Vendor		Cat.
HDAC1	Rb	Cell signaling		#2062
E2F1	Rb			#3742
PCNA	M(PC10)			#2586
PARP	Rb			#9542
Cleaved PARP	Rb			#9541
Caspase3	M			#9668
LC-3B	Rb			#2775
Beclin-1	Rb			#3738
Anti-acetyl-Histone H3	Rb			#9649
Anti-acetyl-Histone H4	Rb			#9672
p15	Rb			#4822
p16	Rb			#4824
p21	M (DSC60)			#2946
p27	Rb			#2552
CDK2	Rb			#2546
Cyclin E	M			#4129
CDK6	M			#3136
Cyclin D1	M			#2926
Cyclin D3	M			#2936
CDC2	Rb			#9112
Cyclin A	M			#4656
p-p130	M(G3-245)	Santa cruz		sc16300R
DP-1	Rb(K-20)			Sc-610
E2F4	Rb(C-20)			Sc-866
E2F5	Rb(E-19)			Sc-999
HDAC2	Rb(H-54)			Sc-7899
GAPDH	M(6c5)			Sc-32233
anti-pRb	M(G3-245)	BD Pharmingen		#14001A
*Rb: Rabbit, M: mouse
